# Supplementary material for: Outcome myasthenia gravis patients with Covid-19
Source: Research Square preprint supplement (doi:10.21203/rs.3.rs-1455897/v1), 2022-03-17
Supplement: Supplementary file 1 [file d9b6ea88da22032cf9f8d5ca.xlsx]

## Sheet: Sheet1
Table 1. Data about clinical course, therapy, diagnosis and outcome our patients
No.	Patient number	Patient 1	Patient 2	Patient 3	Patient 4	Patient 5	Patient 6	Patient 7	Patient 8	Patient 9	Patient 10	Patient 11	Patient 12	Patient 13
1	Sex, age	Male, 43	Male, 78	Male, 70	Male, 58	Male, 56	Male, 65	Male, 32	Male, 57	Male, 42y	Female, 48 y	Female, 20	Male, 40y	Male, 43y
2	Additional diagnoses	Sjogren`s syn. Hypertension; Obesity	Hypertension; DM, Insulin dependence	Hypertension;	Hypertension	no	Hypertension	no	no	no	no	no	no	no
3	Year of MG diagnosis	2017	2010	2012	2016	2017	2017	2013	2020	2009	2015	2020	2012	2004
4	Antibody to AChR	seronegative	seropositive	seropositive	seropositive	seropositive	seropositive	seronegative	seropositive	yes	yes	yes	Seropositive	Seropositive
5	MGFA at begining	3A	2A	3A	3B	4B	4B	3A	3B	4A	3A	2A	MGFA 3A	MGFA IIIB
6	Thymectomy Y/N (PH)	Yes, 2019, hyperplasia	no	no	no	no	no	Yes, hyperplasia	No, it is planned	Yes, 2010, thymoma	Yes, 2015, hyperplasia	Yes, 2020, hyperplasia	2012. hyperplasia	2004. thymoma
7	Chronic MG treatment (daily dose, unit, route)	Prednisone 30 mg, PO, alternatively; Piridostigmine 60 mg, PO; Azathioprine 100 mg, PO	Piridostigmine 60 mg, PO	Azathioprine 100 mg, po; Piridostigmine 120 mg, daily, PO	Prednisone 30 mg alternatively, Azathioprine 50 mg, piridostigmine 60 mg	Piridostigmine 120 mg, PO; Azathioprine 100 mg, PO	Piridostigmine 6120 mg, PO; Azathioprine 100 mg, PO	Piridostigmine 180 mg, PO, Azathioprine 100 mg, PO	Piridostigmine 6180 mg, PO; Prednisone 20 mg, PO, alternatively; Cyclosporine A 100 mg, PO	Piridostigmine 240 mg, PO, Prednisone 30 mg, PO, alternatively; Azathioprine 50 mg, PO	Piridostigmine 60 mg, PO; Prednisone 30 mg alternatively; Azathioprine 100 mg, PO	Piridostigmine 60 mg, PO, Prednisone 30 mg, PO, alternatively; with tappering regiment	pirydostigmine 180 mg, prednisolone 30 mg on alternative day and azathioprine 100 mg/cyclosporine A 2x100 mg in the last 3 years	Pyrudostigmeine 60 mgpo some times, in last 12 years
8	MGFA before infection	1	1	1	1	1	1	1	2B	2A	1	1	2B	1
9	Maximum MGFA score during infection	2	2	1	2B	3A	2	1	2B	2A	1	1	1	1
10	Test for Covid19	PCR +	PCR +	PCR +	PCR +	PCR +	PCR +	PCR –, Antibodies to SARS-CoV-2 +	PCR +	PCR	PCR	Antibody + for SARS-CoV-2	PCR +	PCR +
11	SARS-CoV-2 related symptoms	fever (39 °C); malaise, myalgia and pain in chest	cough, fever (38 °C), reduction of smell sensations	cough, malaise, diarrhea	fever (39 °C), cough, malaise	fever (39 °C), malaise, cough	Fever, Malaise, diarrhea	reduction of smell, sensations cough	Fever, malaise, cough	Sniffle and exhaustion	fatigue, dry cough and diarrhea	No symptoms	febrile (38,5°C), coughed, lost his sense of smell	fever (38,5) cough, arthralgiae, cephalalgia
12	hospitalisation	yes	yes	yes	yes	yes	yes	no	no	No	No	no	yes	no
13	Laboratory during COVID19	CRP 22,9- 291 mg/L; D-dimer 253 ng/ml	WBC 14,1-20,08 x10^9; CRP 128-168 mg/L; D-dimer 730 ng/ml	CRP 276 mg/L; Creatinine 187 ?mol/L; IL6 176 pg/ml	CRP 288 mg/L; Creatinine 192 ?mol/L; IL-6 192 pg/ml	D-dimer normal; CRP 202 mg/L,	CRP 196 mg/L,	NN	WBC 3.5 x10^9	normal	normal	no	CRP 100,2;D-dimer659; LDH 112	CRP 33,3; AST 77 i ALT 134.
14	Lung CT-scan	patchy ground glass opacities in both lungs	Striped spotted shadows	Pneumonia billateralis	Pneumonia billateralis	Pneumonia billateral	Pneumonia	No performed	No performed	no	no	no	bilateral interstitial pneumonia	No performed
15	Evidence of myasthenic exacerbation	Yes	yes	no	yes	yes	yes	no		no	no	no	no	no
16	Main therapy during infection (daily dose, unit, route)	Roxithromycin 150 mg, PO; Cefixime 400 mg, PO; Ceftriaxone 1g. IV; Cefprozil 500 mg, PO	Ceftriaxone 1 g, IV; Imipenem/ Cilastatin 500 mg, IV; Low molecular Heparin (Fraxiparine 5700 UI AXa/0.6 ml, SC); Prednisone 60 mg alternativly	Cephalosporine (1g.iv) Clexane 6000antu-Xa IU/0.6 ml sc; Tocilizumab 800 mg, iv Enalapril 25 mg, p.o	Cephalosporine - Ceftriaxone 1g.IV), Cefixime 400 mg, PO; Fraxiparine, 5700 UI, AXa/0.6 ml, SC; Tocilizumab 800 mg, IV	Prednisone 80 mg, im, Fraxiparine 5700 UI AXa/0.6 ml, SC; Piridostigmine 60 mg, PO, QID; Azathioprine 100 mg, PO; Cefixime 400 mg, PO; Ceftriaxone 1g. IV; IVIG	Prednisone 80 mg, IM; Fraxiparine 5700 UI AXa/0.6 ml, SC; Pyridostigmine, Azathioprine 100 mg, PO; Cefixime 400 mg, PO Ceftriaxone 1g. IVIg (0,4 gr/BW) 5 consecutive days	No change in therapy	Azithromycin 500 mg, IM, Vitamins	Polyvitamine, acetylsalicylic acid 100 mg, PO	Polyvitamine, Probiotic	Vitamin D3 2000 UI, PO	Antibiotics, Flavipiravir, tocilizumab,	cefixim 400 mg 5 days, vitamines; alfa lipoic acid, D3 1000 IU, acetylsalicylic acid 100 mg
17	respiratory support?	oxygen support during night	oxygen support	high flow of 10% oxygen	mechanical ventilation	mechanical ventilation	mechanical ventilation	no	no	no	no	no	NIV, 15 L/min O2	no
18	outcome	Discharged home	Discharged home	Discharged home	death	death	death	good	good	good	good	good	good	good
